# Supplementary material for: Expression of fluorescence properties by self-PET (photo-induced electron transfer) suppression both in solution and in the solid state
Source: Royal Society of Chemistry journal article supplement (doi:10.1039/c7nj02930f), 2017-01-01
Supplement: c7nj02930f1.pdf [file c7nj02930f1.pdf]

## Supplementary Information

### **Expression of fluorescence property by self-PET (photo-induced electron transfer) suppression both in solution and in the solid state**

Yousuke Ooyama,\* Michitaka Sugino and Joji Ohshita\*

*Department of Applied Chemistry, Graduate School of Engineering, Hiroshima University,  
Higashi-Hiroshima, 739-8527, Japan.*

*Fax: +81 824 24 5494; Tel: +81 824 24 7689; E-mail:yooyama@hiroshima-u.ac.jp*

## Experimental Section:

### General:

IR spectra were recorded on a SHIMADZU IRAffinity-1 spectrometer by ATR method.  $^1\text{H}$  and  $^{13}\text{C}$  NMR spectra were recorded on a Varian-400 or Varian-500 FT NMR spectrometer. High-resolution mass spectral data by ESI were acquired on a Thermo Fisher Scientific LTQ Orbitrap XL. Absorption spectra of solution were observed with a HITACH U-2910 spectrophotometer and absorption spectrum of the solid was recorded by a Shimadzu UV-3600 plus spectrophotometer with a calibrated integrating sphere system. fluorescence spectra were measured with a HORIBA FluoroMax-4 spectrofluorometer. The fluorescence quantum yields in solution were determined by a HORIBA FluoroMax-4 spectrofluorometer by using a calibrated integrating sphere system. Fluorescence decay measurements were performed on a HORIBA DeltaFlex modular fluorescence lifetime system, using a Nano LED pulsed diode excitation source (318 nm).

### Preparation of 3-((anthracen-9-ylmethyl)(methyl)amino)propane-1-sulfonic acid (**An-SO<sub>3</sub>H**)

A solution of 9-(methylaminomethyl)anthracene (0.75 g, 3.4 mmol) and 1,3-propane sultone (0.46 g, 3.7 mmol) in DMF (35 ml) was stirred for 1 day at 100°C. The resulting precipitate was filtered and was washed by DMF to give **An-SO<sub>3</sub>H** (0.71 g, yield 62 %) as a colorless solid; FT-IR (ATR):  $\tilde{\nu}$  = 2727, 1215, 1175, 1153, 1030  $\text{cm}^{-1}$ ;  $^1\text{H}$  NMR (400 MHz, DMSO- $d_6$ )  $\delta$  = 2.05-2.20 (m, 2H), 2.59-2.62 (m, 2H), 2.70 (d, 3H), 3.55-3.60 (m, 2H), 5.34-5.48 (m, 2H), 7.62 (t, 2H), 7.71 (t, 2H), 8.21 (d,  $J$  = 8.2 Hz, 2H), 8.53 (d,  $J$  = 8.9 Hz, 2H), 8.85 (s, 1H), 9.99 (br, 1H);  $^{13}\text{C}$  NMR (125 MHz, DMSO- $d_6$ )  $\delta$  = 20.15, 49.26, 51.29, 56.58, 121.34, 124.33, 125.57, 127.52, 129.31, 130.89 ppm (one aliphatic carbon signal and two aromatic carbon signals were not observed owing to overlapping with carbon in DMSO- $d_6$  and overlapping resonance, respectively); HRMS (ESI):  $m/z$  (%):[ $\text{M-H}^-$ ] calcd for  $\text{C}_{19}\text{H}_{20}\text{O}_3\text{NS}$ , 342.11694; found 342.11658.

### Preparation of sodium 3-((anthracen-9-ylmethyl)(methyl)amino)propane-1-sulfonate (**An-SO<sub>3</sub>Na**)

A solution of **An-SO<sub>3</sub>H** (0.18 g, 0.51 mmol) in aqueous NaOH (25 ml, 0.02 M) and ethanol (25 ml) was stirred for 1 day at reflux. After concentrating under reduced pressure, the resulting residue was chromatographed on reverse-phase silica gel (methanol as eluent) to give **An-SO<sub>3</sub>Na** (0.19 g, yield 87 %) as an orange-yellow solid; FT-IR (ATR):  $\tilde{\nu}$  = 1182 (br), 1045  $\text{cm}^{-1}$ ;  $^1\text{H}$  NMR (400 MHz, DMSO- $d_6$ )  $\delta$  = 1.78-1.85 (m, 2H), 2.06 (s, 3H), 2.32-2.36 (m, 2H), 2.59 (t,  $J$  = 7.2 Hz, 2H), 4.38 (s, 2H), 7.48-7.57 (m, 4H), 8.07 (d,  $J$  = 9.0 Hz, 2H), 8.50 (d,  $J$  = 9.0 Hz, 2H), 8.56 (s, 1H);  $^{13}\text{C}$  NMR (125 MHz, DMSO- $d_6$ )  $\delta$  = 23.13, 40.88, 49.47, 53.09, 56.71, 125.00, 125.11, 125.69, 127.06, 128.79, 130.75, 130.95 ppm (one aromatic carbon signal was not observed owing to overlapping resonance); HRMS (ESI):  $m/z$  (%):[ $\text{M-H}^-$ ] calcd for  $\text{C}_{19}\text{H}_{20}\text{O}_3\text{NS}$ , 342.11694; found 342.11670.

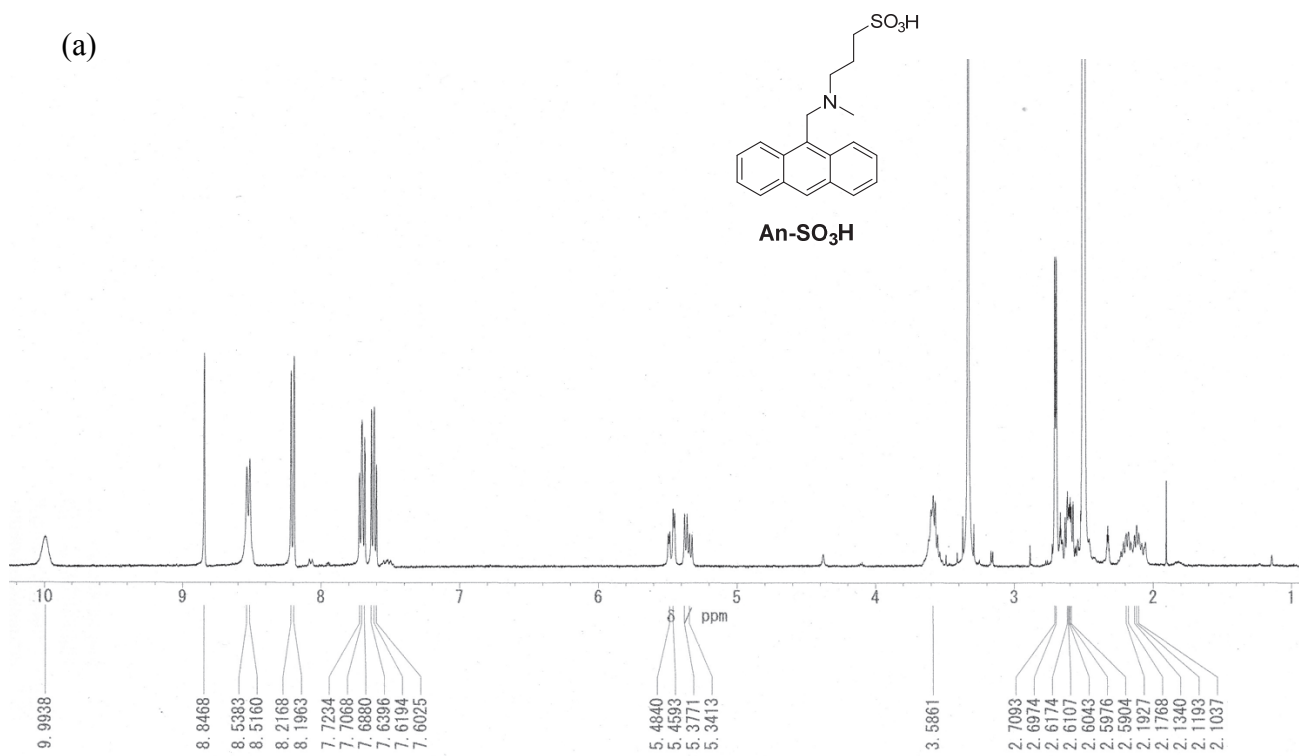

(b)

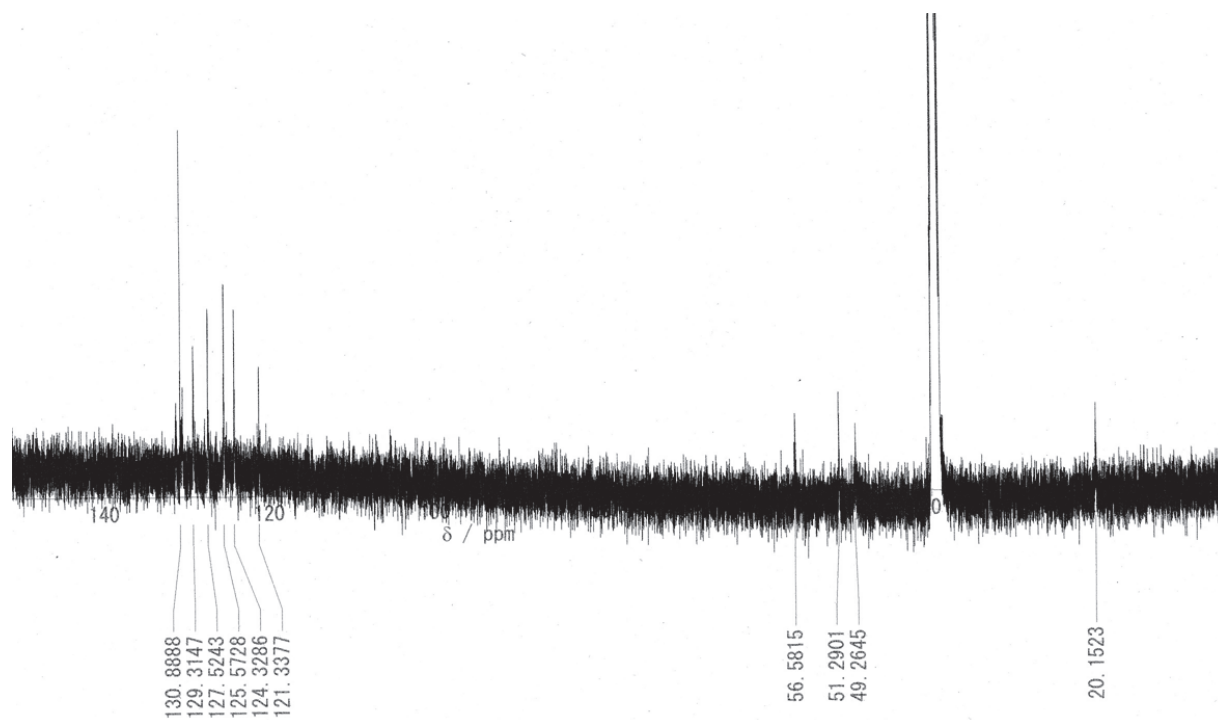

**Fig. S1** (a) <sup>1</sup>H HMR (400 MHz) and (b) <sup>13</sup>C HMR (125 MHz) of An-SO<sub>3</sub>H in DMSO-d<sub>6</sub>.

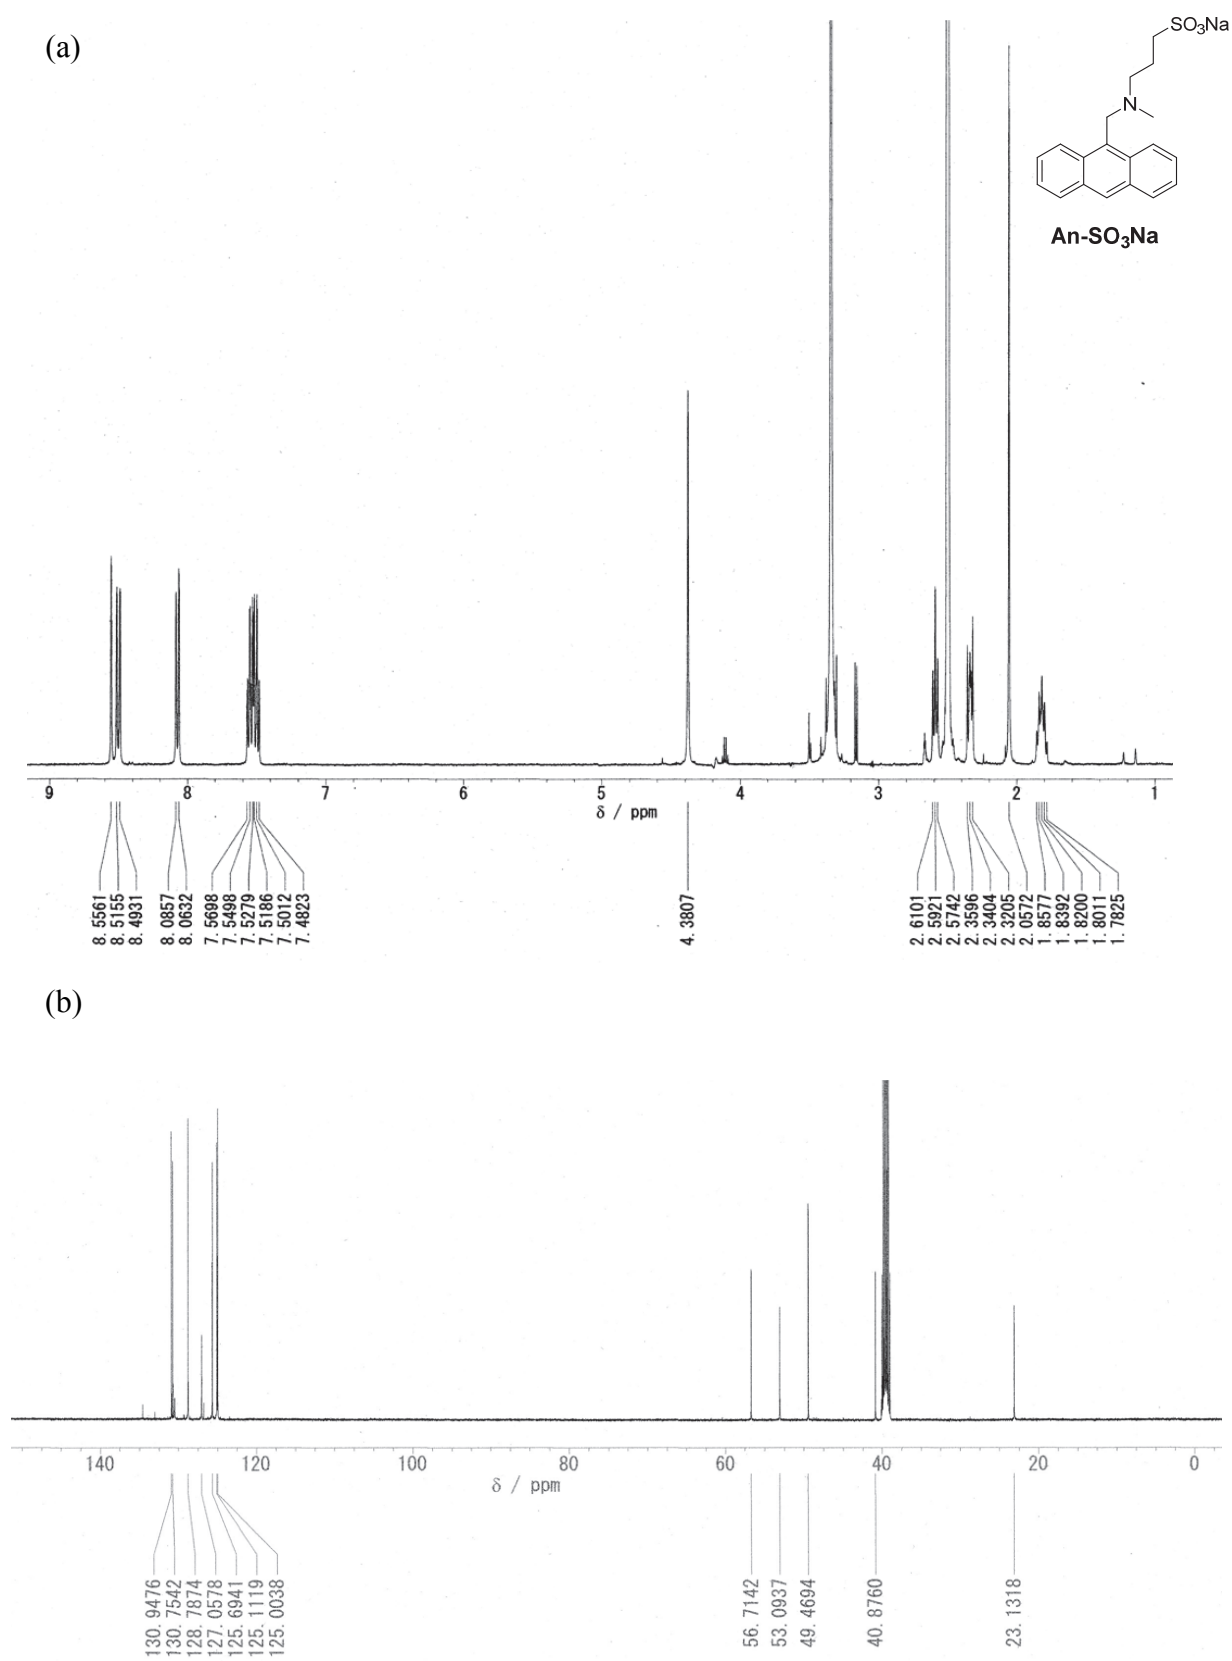

**Fig. S2** (a)  $^1\text{H}$  HMR (400 MHz) and (b)  $^{13}\text{C}$  HMR (125 MHz) of **An-SO<sub>3</sub>Na** in DMSO-*d*<sub>6</sub>.

(a)

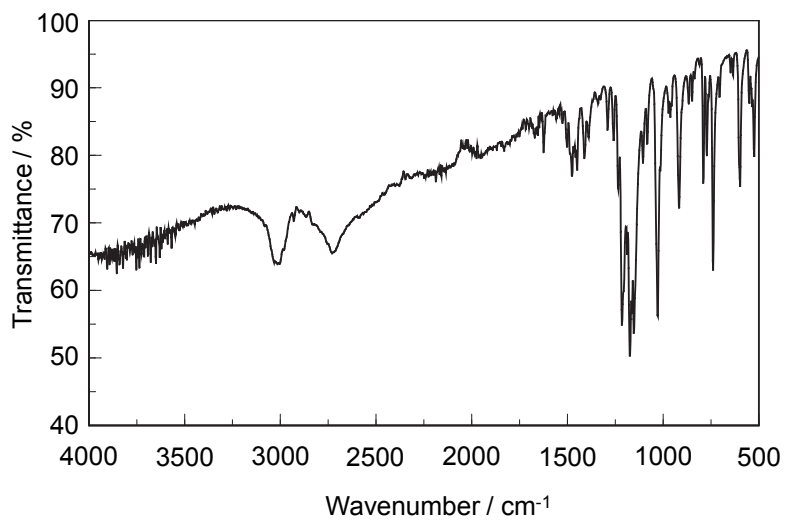

(b)

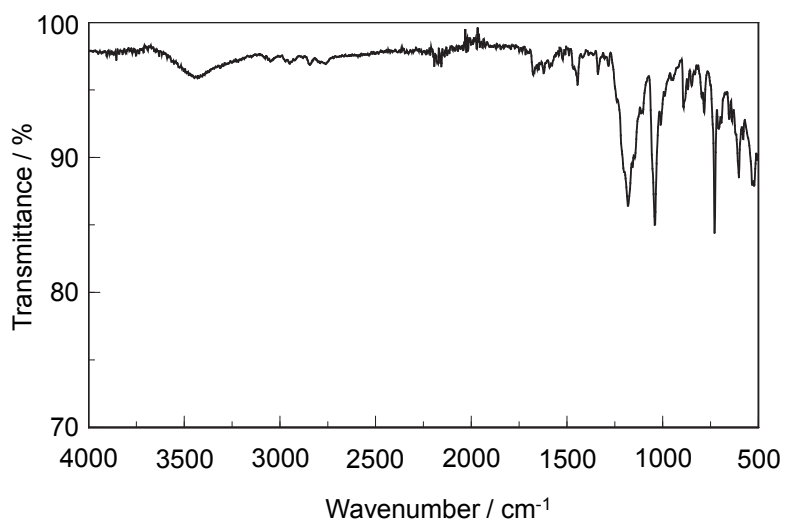

**Fig. S3** FTIR spectra of (a) **An-SO<sub>3</sub>H** and (b) of **An-SO<sub>3</sub>Na**.
